# Supplementary material for: A drug release switch based on protein-inhibitor supramolecular interaction
Source: Royal Society of Chemistry journal article supplement (doi:10.1039/c6ra03543d), 2016-01-01
Supplement: c6ra03543d1.pdf [file c6ra03543d1.pdf]

## Supporting Information

### Drug release switch based on protein-inhibitor supramolecular interaction

Xiaoliang Wang,<sup>a</sup> Pengchang Liu,<sup>a</sup> Zhijun Chen,<sup>\*a</sup> Jiacong Shen<sup>a</sup>

<sup>a</sup> State Key Laboratory of Supramolecular Structure and Materials, Institute of Theoretical Chemistry, and International Joint Research Laboratory of Nano-Micro Architecture Chemistry, Jilin University, 2699 Qianjin Street, Chaoyang, Changchun, Jilin 130012, People's Republic of China

Corresponding Author

\*Telephone: +86-186-8663-6807 Fax: +86-431-8519-3421.

E-mail: [zchen@jlu.edu.cn](mailto:zchen@jlu.edu.cn).

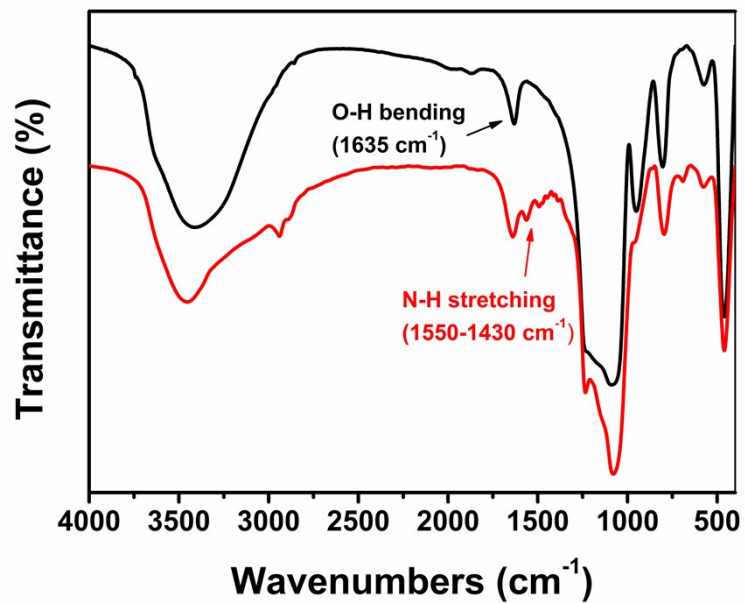

**Figure S1** The FT-IR spectra of the MSN-OH (black) and MSN-NH<sub>2</sub> (red). The twin peaks (stretching vibration of N-H bond) at 1430–1550 $\text{cm}^{-1}$  indicate the presence of amino groups.

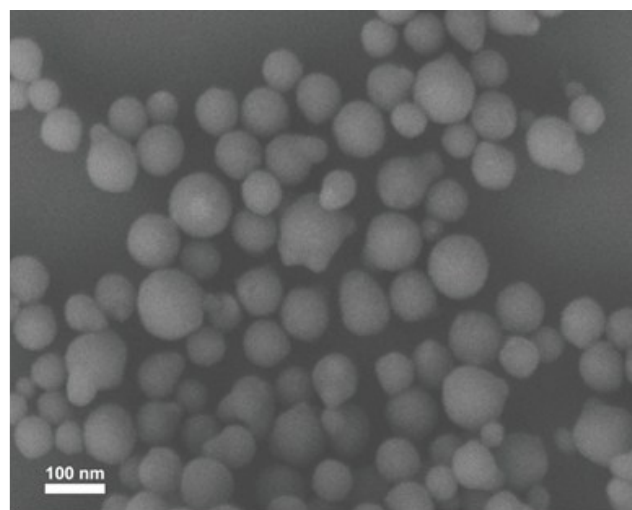

**Figure S2** The SEM image of the MSN-OH nanoparticles.

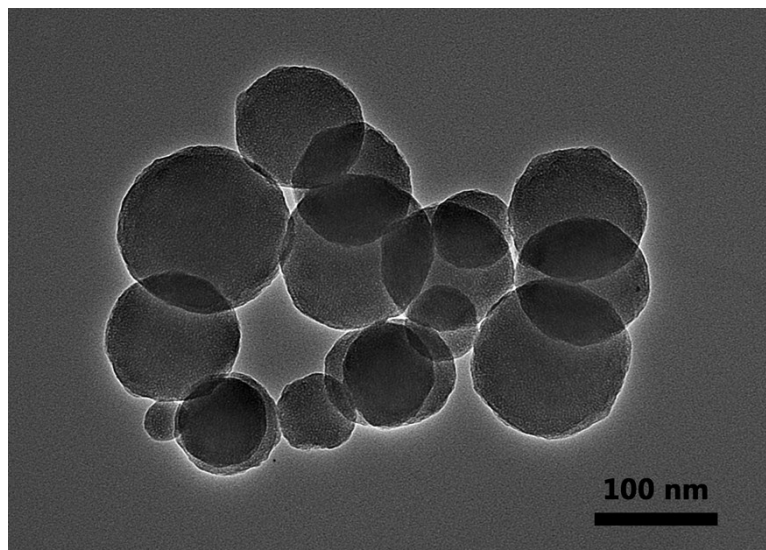

**Figure S3** The TEM image of the MSN-NH<sub>2</sub> nanoparticles.

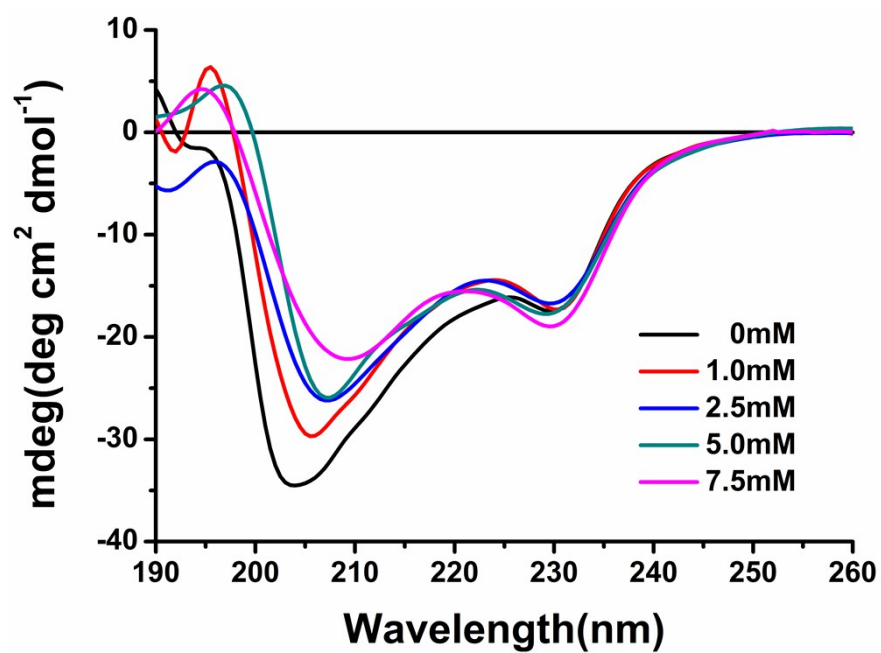

**Figure S4** The CD spectra of CTFA in the absence (0 mM) and presence of different concentration of PMSF (0–7.5 mM).

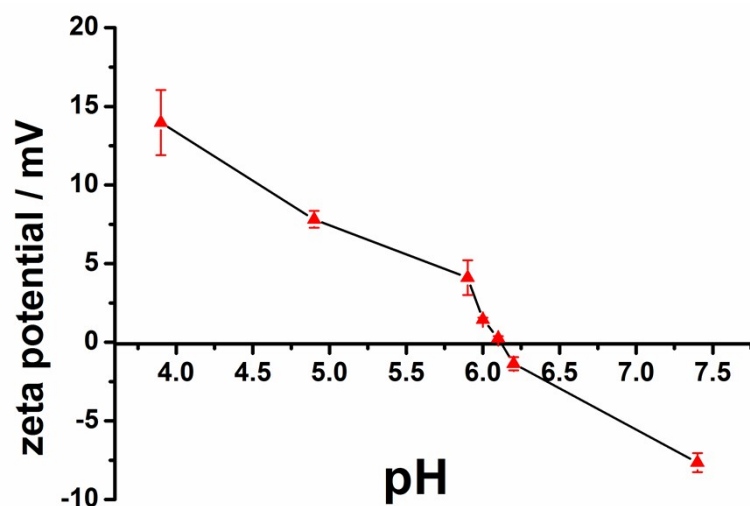

**Figure S5** Zeta potential of CTRA at different pHs. (The error bars represent the standard deviation of three measurements.)

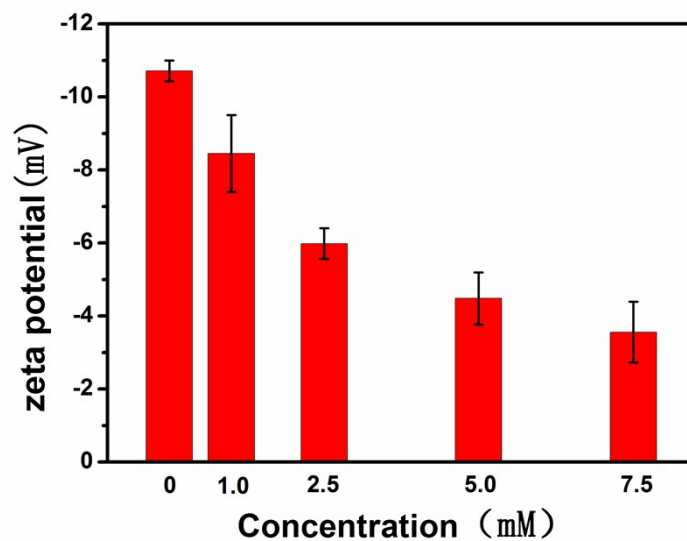

**Figure S6** Zeta potential of CTRA under different concentration of PMSF.

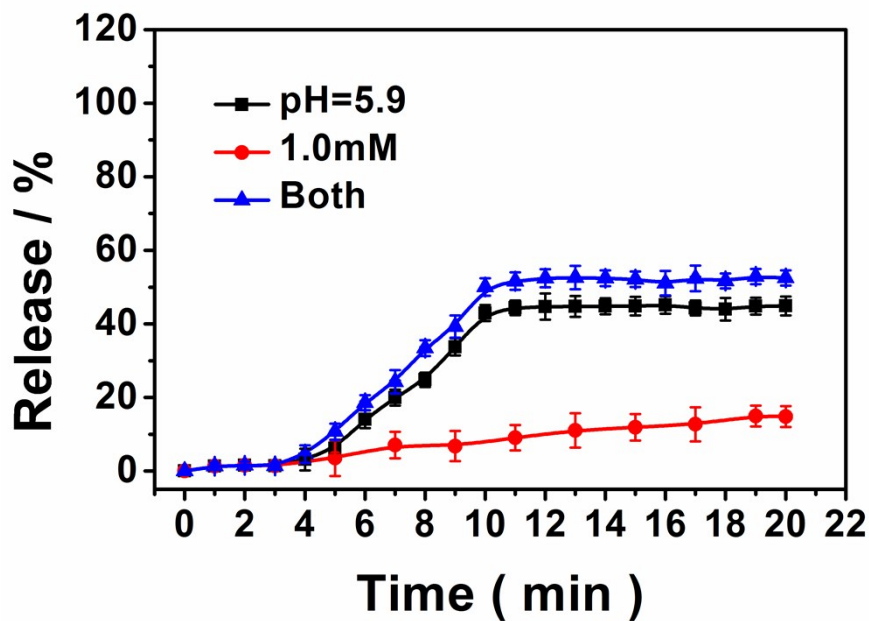

**Figure S7** The cargo release of CTRA-MSN-NH<sub>2</sub>@Rh 6G is approximately 42% at pH 5.9; the cargo release is approximately 14% when PMSF concentration is 1.0 mM; the cargo release is approaching 52% when both conditions are met (PMSF concentration is 1.0 mM, environmental pH is 5.9)

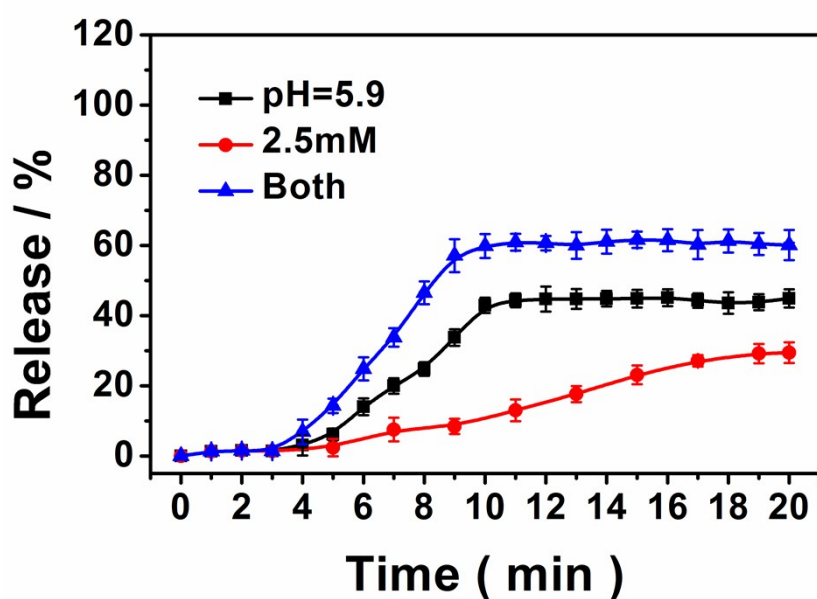

**Figure S8** The cargo release of CTRA-MSN-NH<sub>2</sub>@Rh 6G is approximately 42% at

pH 5.9; the cargo release is approximately 29% when PMSF concentration is 2.5 mM; the cargo release is approaching 60% when both conditions are met (PMSF concentration is 2.5 mM, environmental pH is 5.9).

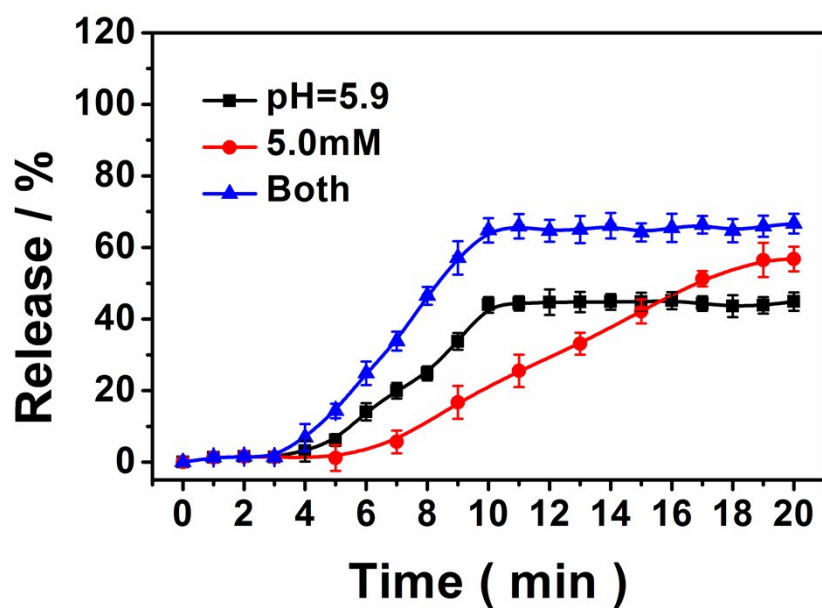

**Figure S9** The cargo release of CTRA-MSN-NH<sub>2</sub>@Rh 6G is approximately 42% at pH 5.9; the cargo release is approximately 60% when PMSF concentration is 5.0 mM; the cargo release is approaching 70% when both conditions are met (PMSF concentration is 5.0 mM, environmental pH is 5.9).

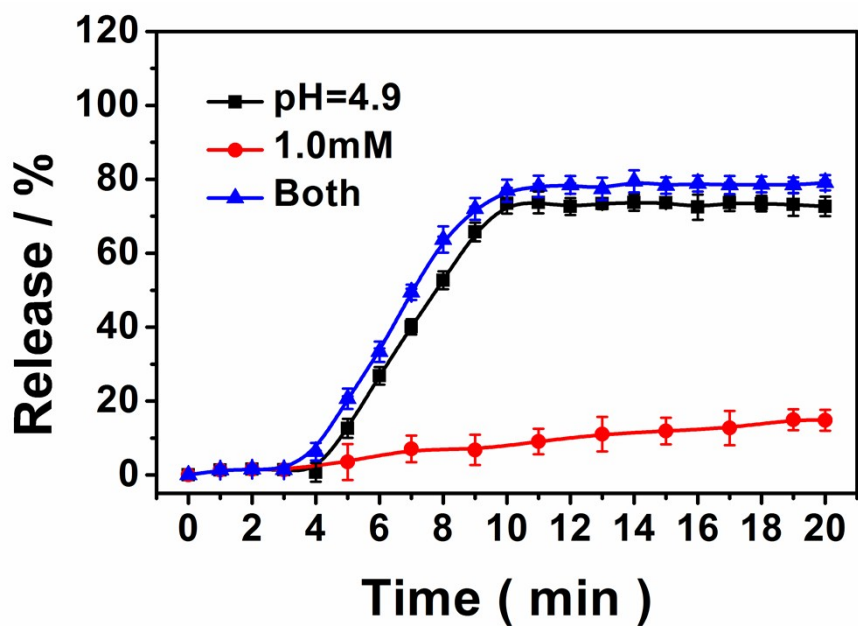

**Figure S10** The cargo release of CTRA-MSN-NH<sub>2</sub>@Rh 6G is approximately 70% at pH 4.9; the cargo release is approximately 14% when PMSF concentration is 1.0 mM; the cargo release is approaching 80% when both conditions are met (PMSF concentration is 1.0 mM, environmental pH is 4.9).

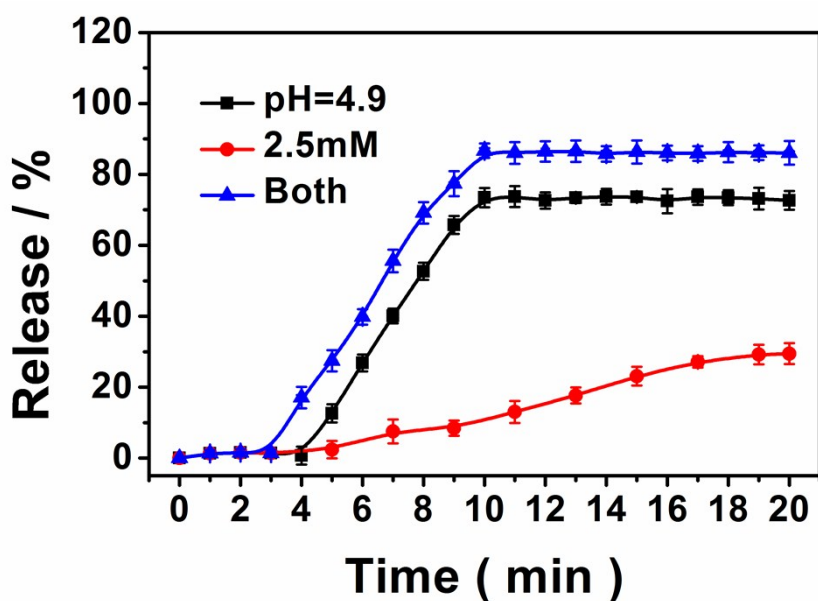

**Figure S11** The cargo release of CTRA-MSN-NH<sub>2</sub>@Rh 6G is approximately 70% at

pH 4.9; the cargo release is approximately 29% when PMSF concentration is 2.5 mM; the cargo release is approaching 90% when both conditions are met (PMSF concentration is 2.5 mM, environmental pH is 4.9).

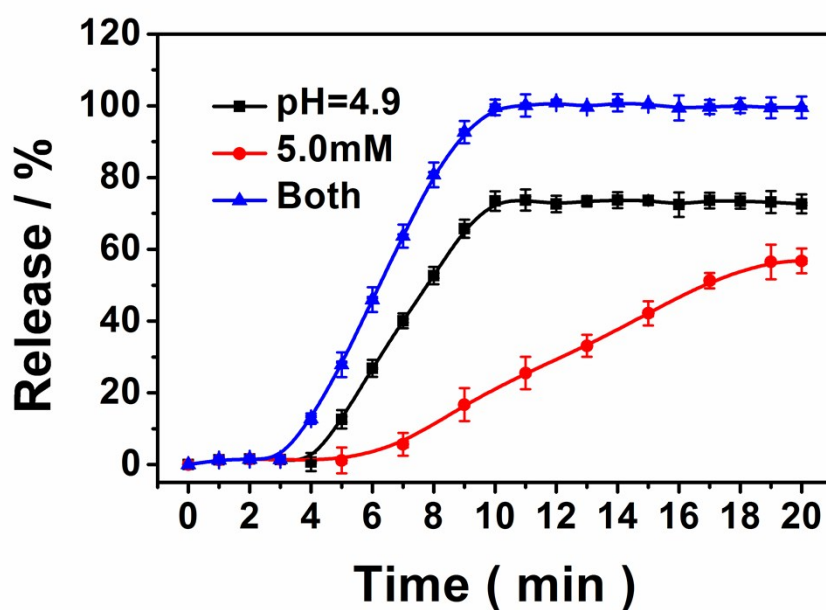

**Figure S12** The cargo release of CTRA-MSN-NH<sub>2</sub>@Rh 6G is approximately 70% at pH 4.9; the cargo release is approximately 60% when PMSF concentration is 5.0 mM; the cargo release is approaching 100% when both conditions are met (PMSF concentration is 5.0 mM, environmental pH is 4.9).
